# Supplementary material for: Synthesis, Structure, Biological Activity, and Luminescence Properties of a “Butterfly”-Type Silver Cluster with 3-Benzyl-4-phenyl-1,2,4-triazol-5-thiol
Source: MDPI journal article supplement (doi:10.3390/molecules29010105), 2023-12-23
Supplement: s1 [file s1]

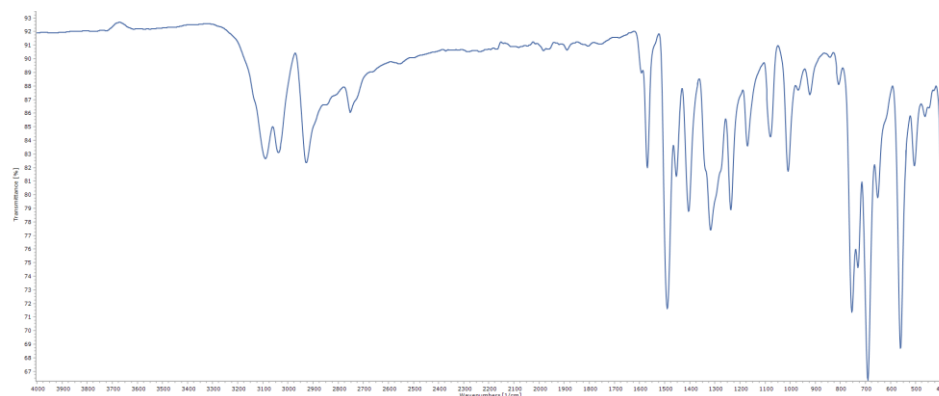

**Figure S1.** IR-spectrum of 3-benzyl-4-phenyl-1,2,4-triazol-5-thiol (L)

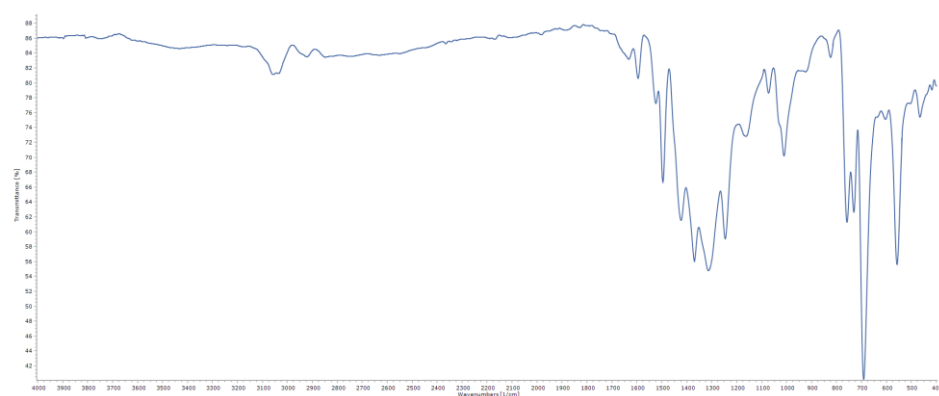

**Figure S2.** IR-spectrum of I

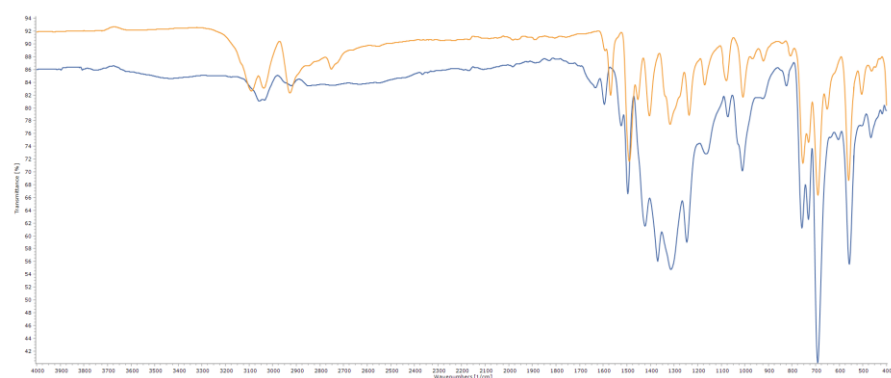

**Figure S3.** Superposition of the IR-spectra of I and L

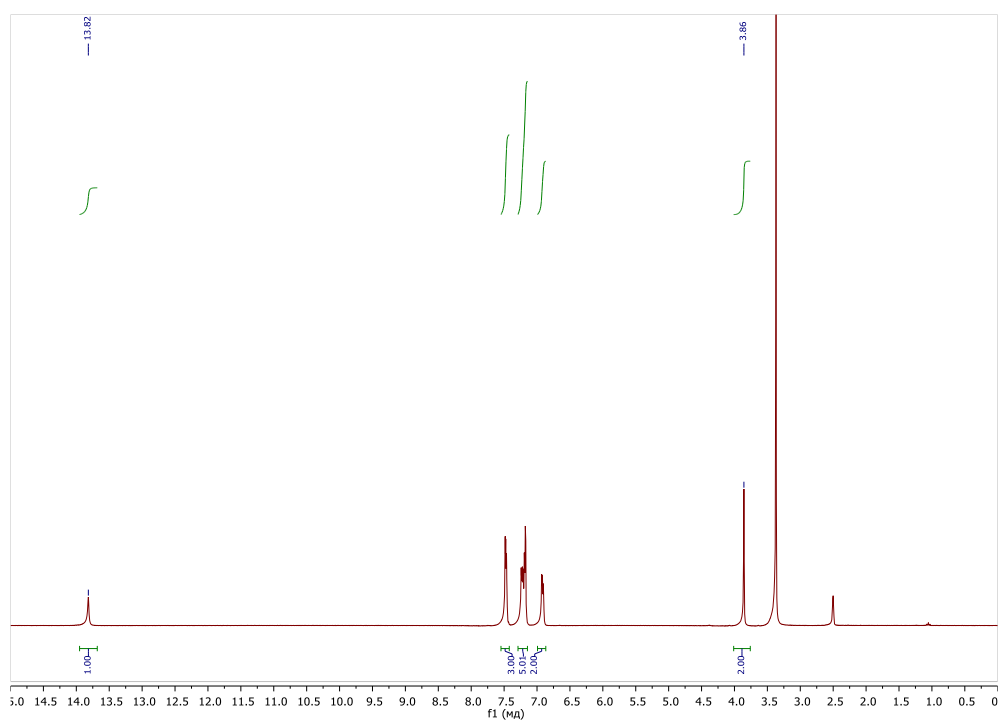

Figure S4. <sup>1</sup>H NMR spectra of L

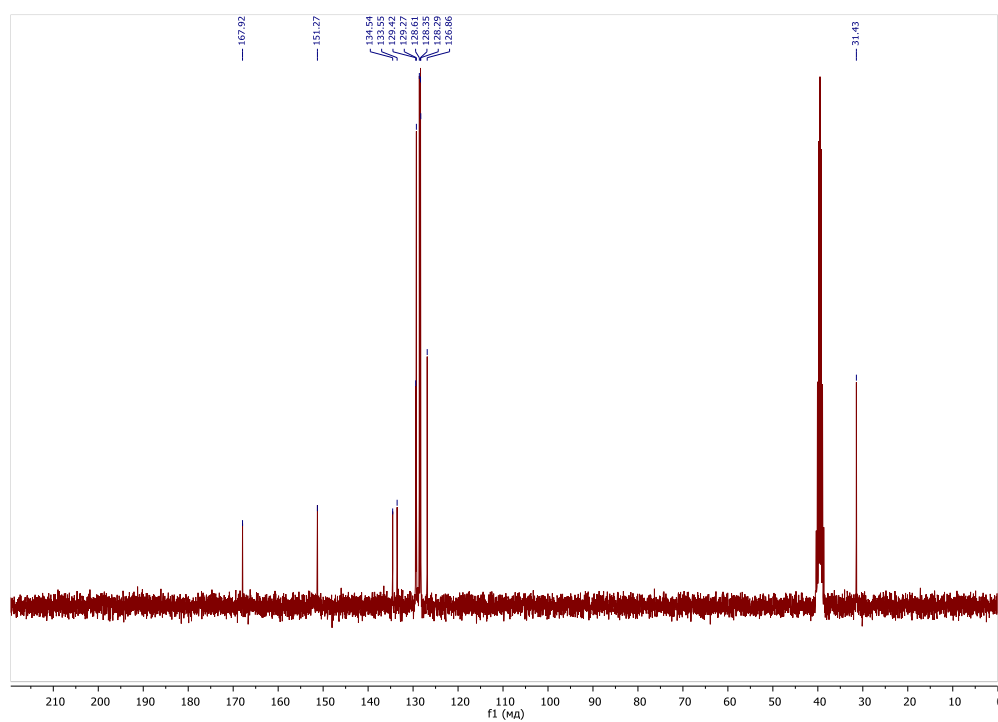

Figure S5. <sup>13</sup>C NMR Spectrum of L

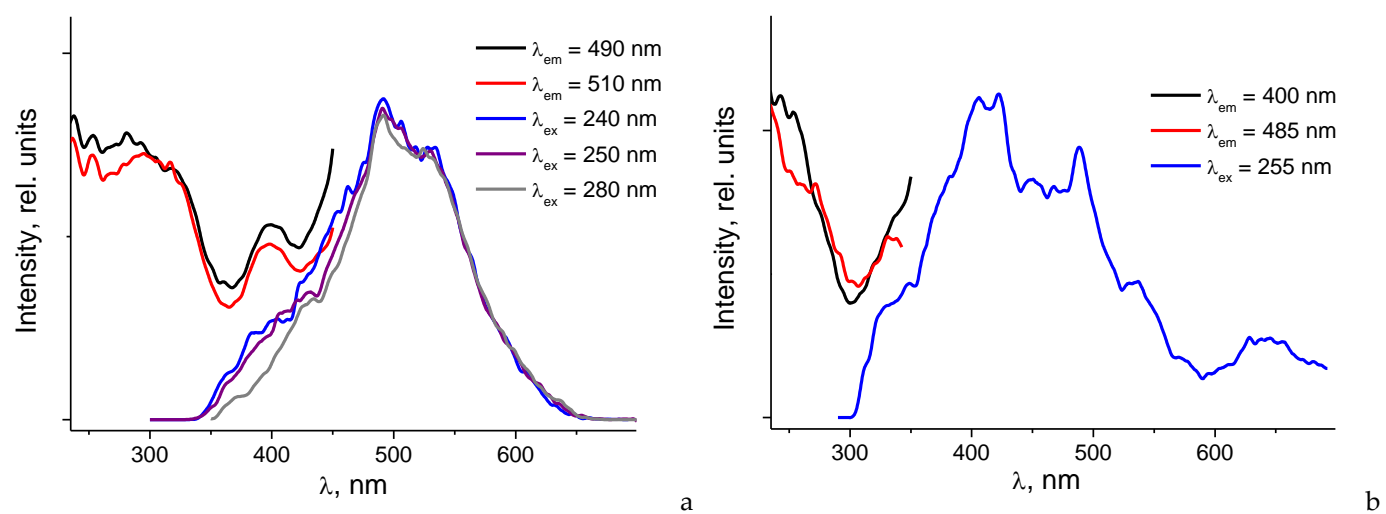

**Figure S6.** Excitation and emission spectra for solid samples L (a) and I (b) at room temperature.
